# Supplementary material for: Seed-assisted synthesis of Co3O4@α-Fe2O3 core–shell nanoneedle arrays for lithium-ion battery anode with high capacity
Source: Royal Society of Chemistry journal article supplement (doi:10.1039/c3ra47189f), 2014-01-01
Supplement: c3ra47189f1.pdf [file c3ra47189f1.pdf]

## Supporting Information

### Seed-assisted Synthesis of $\text{Co}_3\text{O}_4@-\alpha\text{-Fe}_2\text{O}_3$ Core/Shell Nanoneedle Arrays for Lithium-ion Battery Anode with High Capacity

Yongsong Luo,<sup>\*†a,b,e</sup> Dezhi Kong,<sup>†a,b,c</sup> Jingshan Luo,<sup>b</sup> Yanlong Wang,<sup>b</sup> Deyang Zhang,<sup>a</sup> Kangwen Qiu,<sup>a</sup> Chuanwei Cheng,<sup>c</sup> Chang Ming Li<sup>d</sup> and Ting Yu<sup>b,e,f</sup>

<sup>a</sup> Department of Physics & Electronic Engineering, Xinyang Normal University, Xinyang 464000, P. R.China

<sup>b</sup> Division of Physics and Applied Physics, School of Physical and Mathematical Sciences, Nanyang Technological University, 637371, Singapore

<sup>c</sup> Shanghai Key Laboratory of Special Artificial Microstructure Materials and Technology & School of Physics and Engineering, Tongji University, Shanghai 200092, P.R. China

<sup>d</sup> Institute for Clean Energy and Advanced Materials, Southwest University, Chongqing 400700, P. R China

<sup>e</sup> Energy Research Institute at Nanyang Technological University (ERIAN), 639789 Singapore

<sup>f</sup> Department of Physics, Faculty of Science, National University of Singapore, 117542 Singapore

---

\* To whom correspondence should be addressed: E-mail: [eysluo@163.com](mailto:eysluo@163.com) (Y.S. Luo).

† These authors contribute equally to this work.

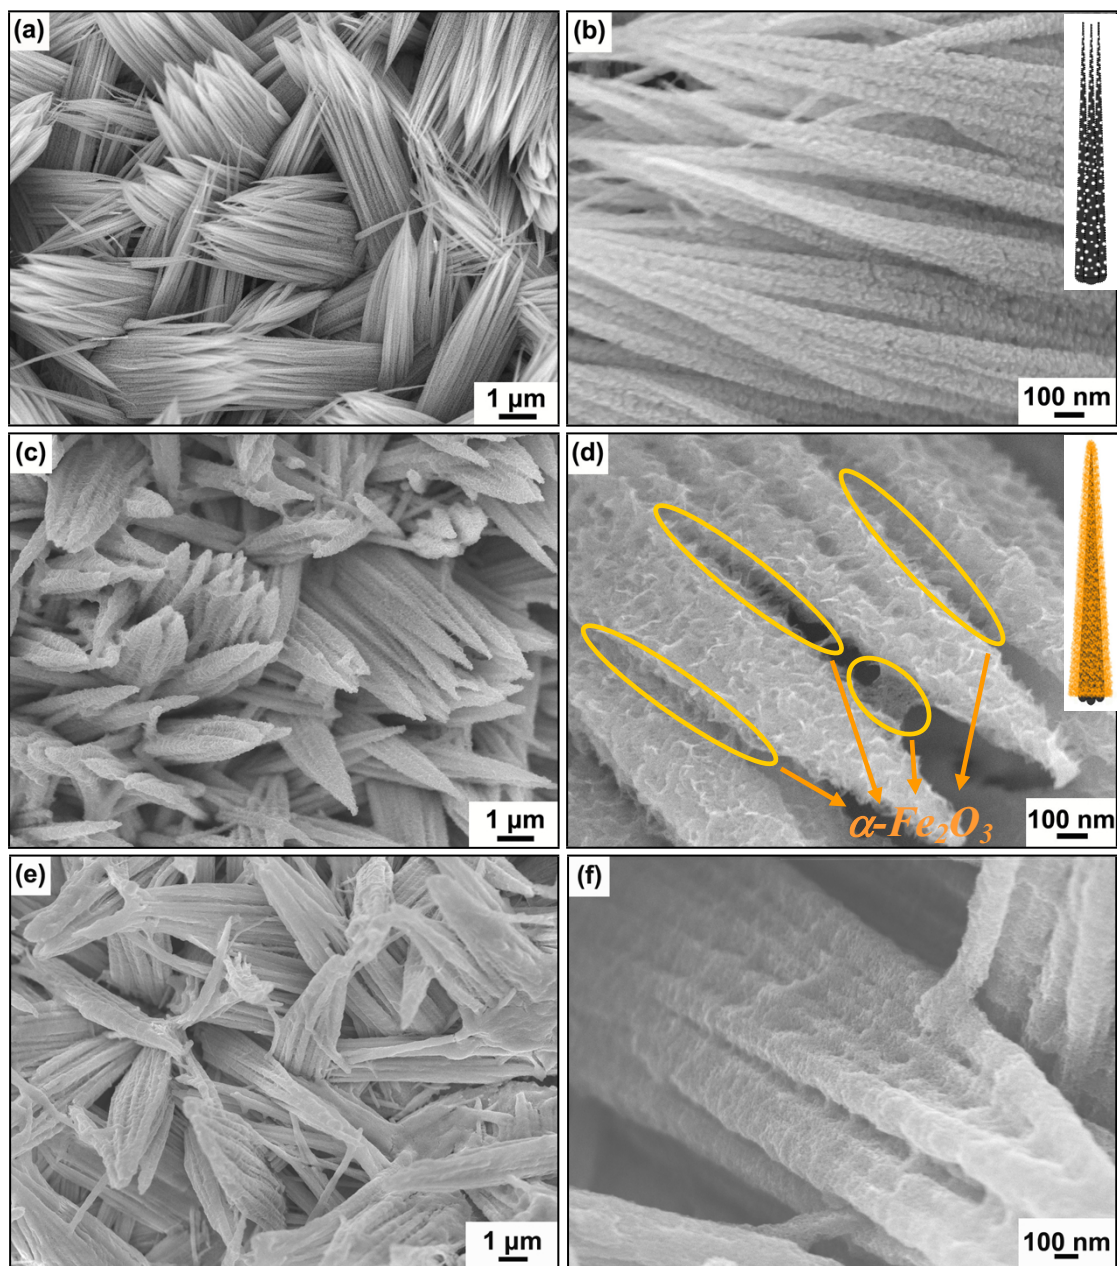

**Fig. S1** (a,b) Low-magnification and enlarged SEM images of the  $\text{Co}_3\text{O}_4$  NAs; (c,d) Low-magnification and enlarged SEM images of the  $\text{Co}_3\text{O}_4@ \alpha\text{-Fe}_2\text{O}_3$  NAs; (e,f) Low-magnification and enlarged SEM images of the  $\text{Co}_3\text{O}_4@ \alpha\text{-Fe}_2\text{O}_3$  NAs after 100 discharge-charge cycles. The inset shows the sketch maps.

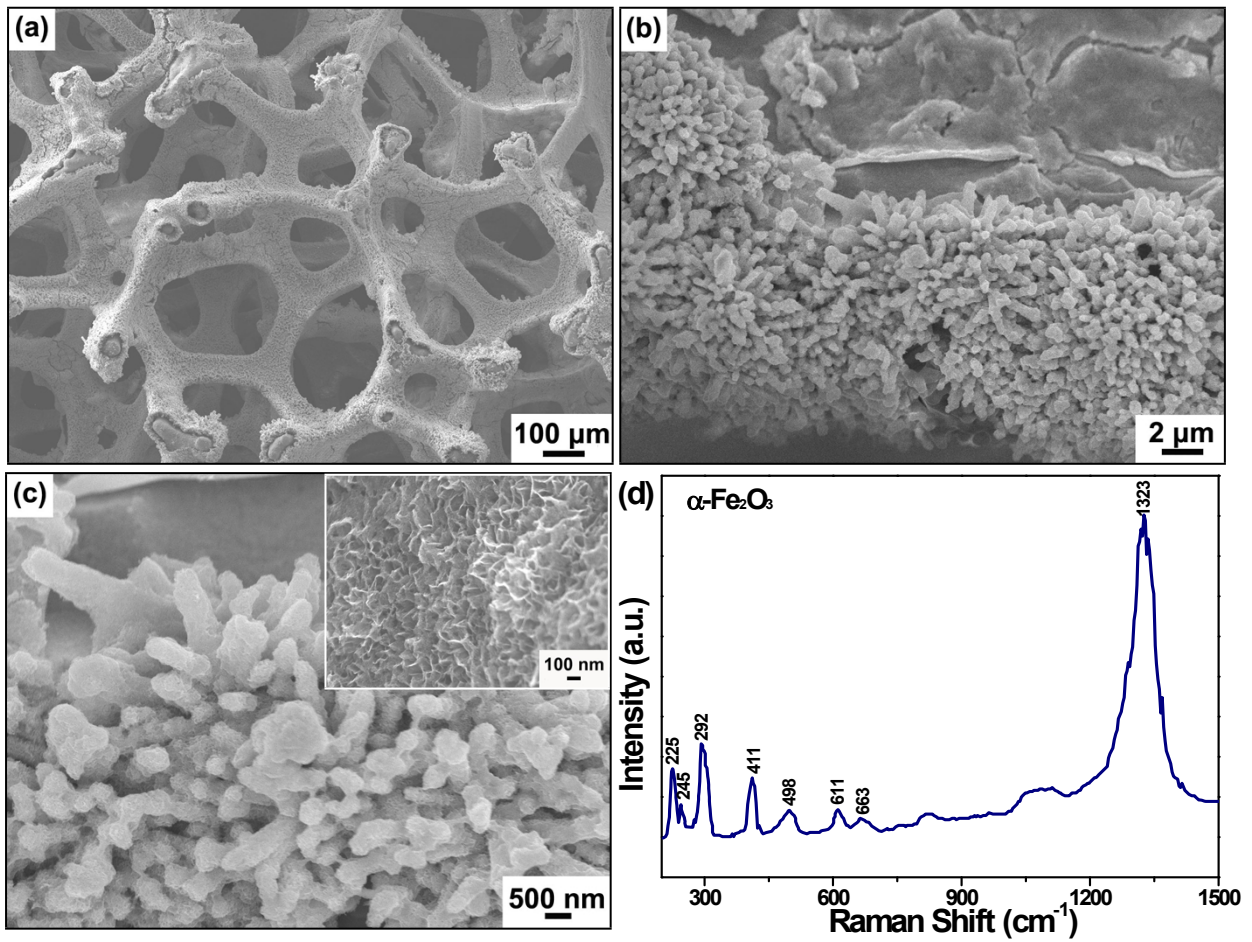

Fig. S2 (a,b,c) Low-magnification and enlarged SEM images of as-annealed  $\alpha$ -Fe<sub>2</sub>O<sub>3</sub> film directly grown on a Ni foam; (d) Raman spectra of the  $\alpha$ -Fe<sub>2</sub>O<sub>3</sub> film.

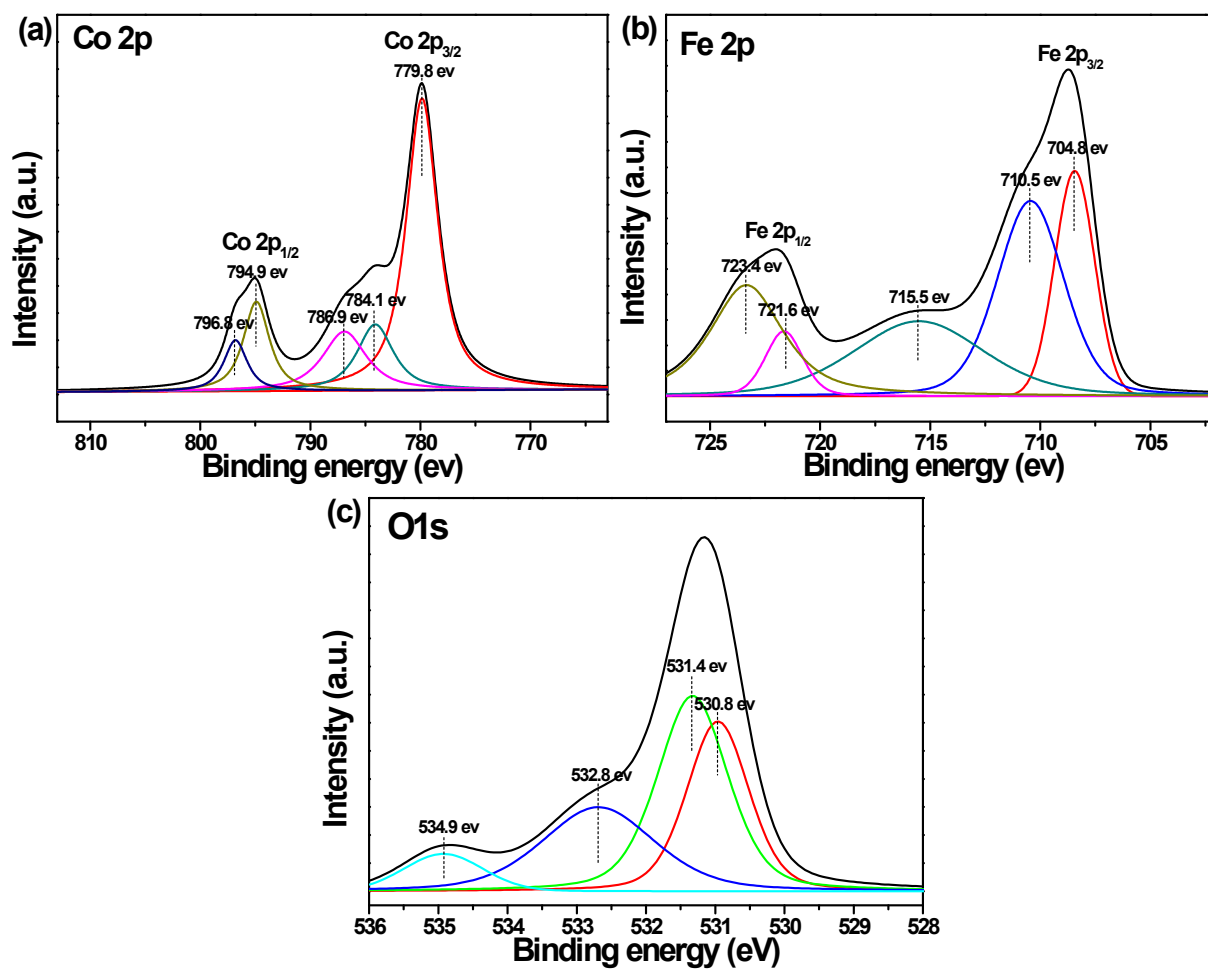

**Fig. S3** XPS spectra of (a) Co 2p, (b) Fe 2p, (c) O 1s regions of the  $\text{Co}_3\text{O}_4@ \alpha\text{-Fe}_2\text{O}_3$  NAs.
